# Supplementary material
Source: publisher site journal article supplement (https://www.dovepress.com/article/400467)
Supplement: Supplementary file 1 [file get_supplementary_file.php]

**Table S1**. Mn ratio in the MnOx-CeO2 NPs

|  | Molar ratio of Mn/(Mn+Ce) | |
| --- | --- | --- |
| Experimental design (%) | ICP-MS (%) |
| MnOx-CeO2 NPs | 0 | 0.0 |
| 10 | 3.0 |
| 20 | 3.8 |
| 30 | 4.0 |
| 40 | 4.4 |

**Figure S1**. The ·OH scavenging effect of MnOx-CeO2 NPs.


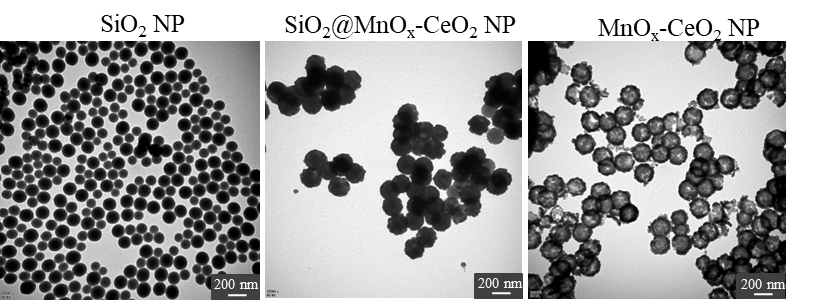


**Figure S2**. The TEM image of SiO2 NPs, SiO2@ MnOx-CeO2 NPs and MnOx-CeO2 NPs.


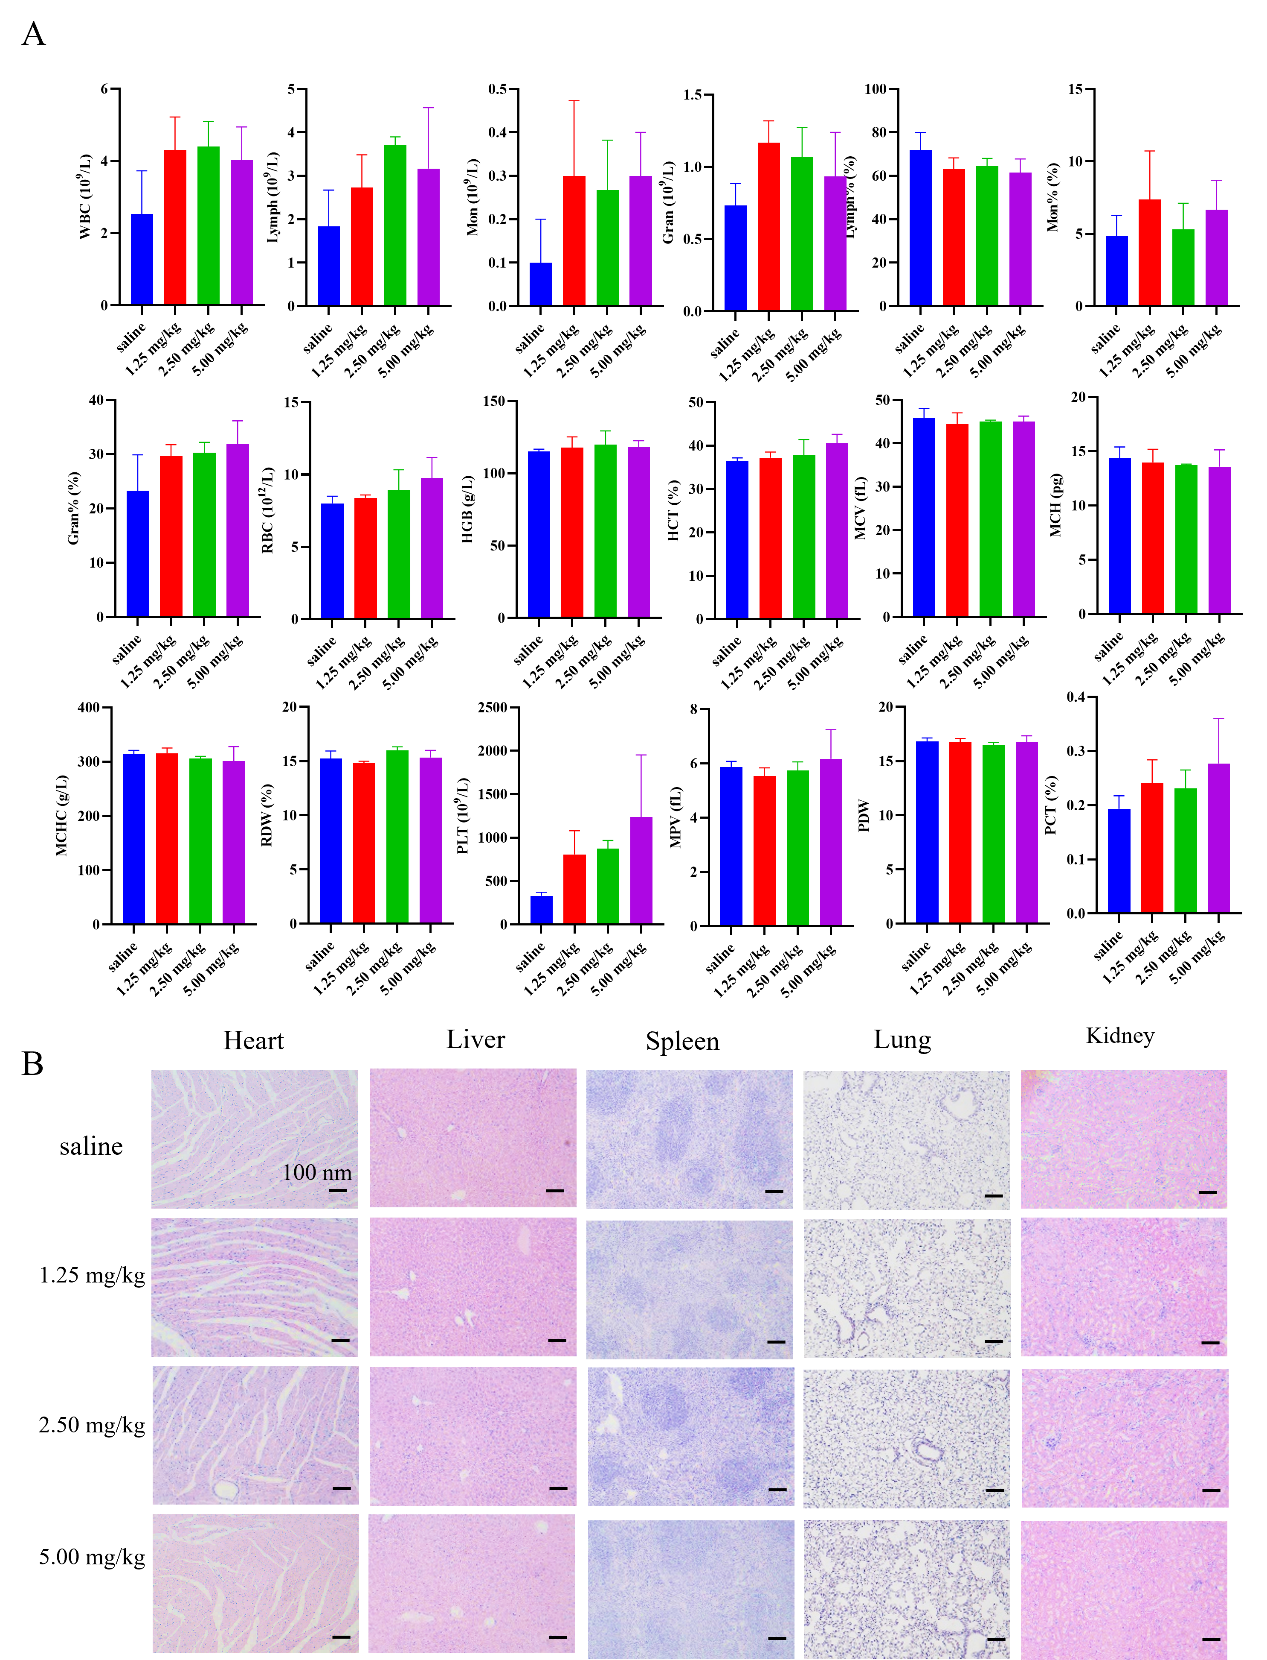


**Figure S3**. In vivo saefty of MnOx-CeO2 NPs 28 days after *i.v.* injection. (A) blood analysis, (B) H&E staining of different organs.

**Figure S4**. *In vivo* bioditribution of MnOx-CeO2 NPs after *i.v.* injection.
